# Supplementary material
Source: PubMed Central journal article supplement (PMC5609337)
Supplement: blood791103-suppl1.pdf [file blood791103-suppl1.pdf]

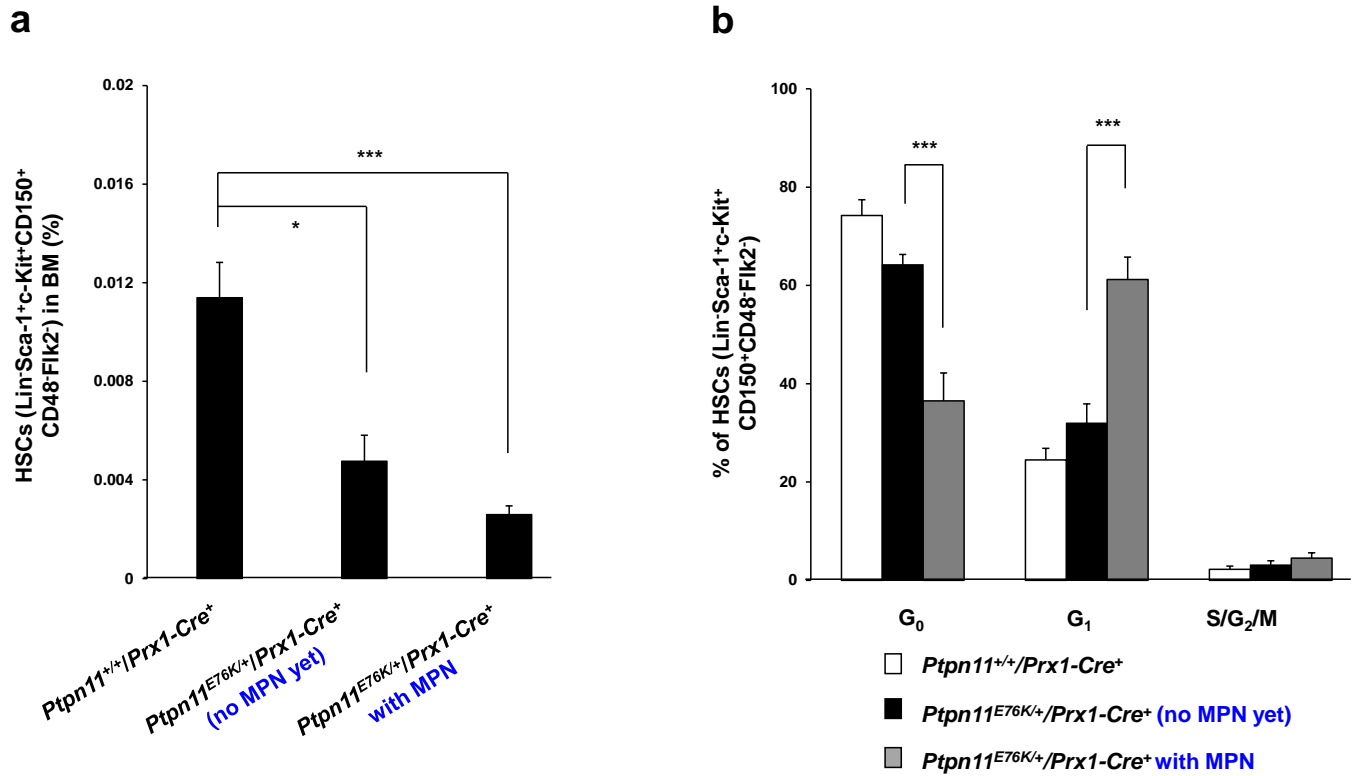

**Supplementary Figure 1. Aberrant HSC activation proceeds full development of MPN in *Ptpn11*<sup>E76K/+</sup>/*Prx1-Cre*<sup>+</sup> mice.** *Ptpn11*<sup>E76K/+</sup>/*Prx1-Cre*<sup>+</sup> and *Ptpn11*<sup>+/+</sup>/*Prx1-Cre*<sup>+</sup> mice at 5-10 months old were sacrificed. Cells isolated from BM were assayed by multiparameter FACS to determine the pool size ( $n = 5$  mice/group) (a), cell cycle distribution ( $n = 5$  mice/group) (b) of HSCs (Lin<sup>-</sup>Sca-1<sup>+</sup>c-Kit<sup>+</sup>CD150<sup>+</sup>CD48<sup>-</sup>Flk2<sup>-</sup>).
